# Supplementary material for: What are the applications of single-cell RNA sequencing in cancer research: a systematic review
Source: PubMed Central journal article supplement (PMC8111731; doi:10.1186/s13046-021-01955-1), 2021-05-11
Supplement: 13046_2021_1955_MOESM4_ESM.pdf [file 13046_2021_1955_MOESM4_ESM.pdf]

Table 3. Overview of related studies using scRNA-seq

| Cancer types               | Year | Analyzed cell types                                                         | Number of patients/cells                 | Technique | References |
|----------------------------|------|-----------------------------------------------------------------------------|------------------------------------------|-----------|------------|
| Breast cancer              | 2014 | Metastatic breast cancer cells                                              | Three groups of breast cancer cell lines | scRNA-seq | [113]      |
| LUAD                       | 2015 | Tumor cells<br>Malignant,<br>immune,<br>stromal and<br>endothelial<br>cells | 1; 34 (PDX)                              | scRNA-seq | [114]      |
| Melanoma                   | 2016 | stromal and<br>endothelial<br>cells                                         | 19; 4645                                 | scRNA-seq | [4]        |
| Glioblastoma<br>multiforme | 2018 | Tumor cells                                                                 | 1; over 200                              | scRNA-seq | [115]      |
| MB                         | 2019 | Stromal and<br>tumor cells                                                  | Mice                                     | scRNA-seq | [118]      |
