# Supplementary material for: What are the applications of single-cell RNA sequencing in cancer research: a systematic review
Source: PubMed Central journal article supplement (PMC8111731; doi:10.1186/s13046-021-01955-1), 2021-05-11
Supplement: 13046_2021_1955_MOESM6_ESM.pdf [file 13046_2021_1955_MOESM6_ESM.pdf]

Table 5. Overview of related articles using scRNA-seq

| Cancer types        | Year | Analyzed cell types        | Number of patients/cells                                                                       | Technique                           | References |
|---------------------|------|----------------------------|------------------------------------------------------------------------------------------------|-------------------------------------|------------|
| IDH1 or IDH2 mutant |      |                            |                                                                                                |                                     |            |
| human               | 2016 | Tumor cells                | 6; 4347                                                                                        | scRNA-seq                           | [136]      |
| oligodendrogliomas  |      |                            |                                                                                                |                                     |            |
| IDH-O/IDH-A         | 2017 | Tumor cells and TME        | 16; 14226                                                                                      | scRNA-seq                           | [137]      |
| MB                  | 2019 | Group 3 and Group 4 tumors | 36 (11 PDX models);<br>WNT, SHH, 86890 (4181 novel cells and 78,156 published cells from mice) | scRNA-seq combined with public data | [139]      |
| GBM                 | 2019 | Tumor cells                | 24; 8366                                                                                       | scRNA-seq                           | [138]      |
| Glioma              | 2019 | Glial progenitors and      | Mice                                                                                           | scRNA-seq                           | [140]      |

malignant  
cells  
Tumor cells  
Histone H3.3 G34R/V  
2020 and normal 17; 64943 scRNA-seq [141]  
HGGs  
cells

---
