# Supplementary material for: What are the applications of single-cell RNA sequencing in cancer research: a systematic review
Source: PubMed Central journal article supplement (PMC8111731; doi:10.1186/s13046-021-01955-1), 2021-05-11
Supplement: 13046_2021_1955_MOESM7_ESM.pdf [file 13046_2021_1955_MOESM7_ESM.pdf]

Table 6. Overview of related articles using scRNA-seq

| Cancer types           | Year | Analyzed cell types  | Number of patients/cells | Technique                                            | References |
|------------------------|------|----------------------|--------------------------|------------------------------------------------------|------------|
| RCC                    | 2016 | Tumor cells          | 1; 116 (82 PDX cells)    | scRNA-seq                                            | [143]      |
| IDH-mutant astrocytoma | 2019 | Cancer cells and TME | ;6341                    | Based on scRNA-seq data downloaded from GEO database | [144]      |
